# Supplementary material for: The Relationship between Food Security Status and Sleep Disturbance among Adults: A Cross-Sectional Study in an Indonesian Population
Source: MDPI journal article supplement (doi:10.3390/nu12113411), 2020-11-06
Supplement: s1 [file s1]

Table S1. The Logistic Regression between Covariate Variables and the Outcome

| Variables                                  | Sleep Disturbance * M1 |                     |                   |
|--------------------------------------------|------------------------|---------------------|-------------------|
|                                            | OR                     | 95% CI              | p value           |
| Gender (ref: men)                          |                        |                     |                   |
| Women                                      | 1.17                   | (0.92, 1.49)        | 0.201             |
| Age (years, ref: ≤ 35)                     |                        |                     |                   |
| 36 - 55                                    | 1.03                   | (0.63, 1.67)        | 0.909             |
| ≥ 56                                       | 1.16                   | (0.50, 2.69)        | 0.728             |
| Educational attainment (ref: ≥ 12 years)   |                        |                     |                   |
| Low (< 12 years)                           | <b>0.38</b>            | <b>(0.28, 0.51)</b> | <b>&lt; 0.001</b> |
| Marital Status (ref: never married)        |                        |                     |                   |
| Currently or Ever Married                  | 1.43                   | (0.82, 2.48)        | 0.206             |
| Living Areas (ref: rural)                  |                        |                     |                   |
| Urban                                      | 0.81                   | (0.64, 1.04)        | 0.096             |
| Smoking Habit (ref: never)                 |                        |                     |                   |
| Current Smoker                             | 0.49                   | (0.20, 1.16)        | 0.104             |
| Quit smoker                                | 1.06                   | (0.72, 1.57)        | 0.763             |
| BMI (kg/m <sup>2</sup> , ref: 18.5 - 25.0) |                        |                     |                   |
| 25.1 - 27.0                                | 0.90                   | (0.63, 1.29)        | 0.571             |
| > 27.0                                     | 0.79                   | (0.58, 1.08)        | 0.135             |
| Depressive Symptoms (ref: no)              |                        |                     |                   |
| Yes                                        | <b>3.50</b>            | <b>(2.72, 4.52)</b> | <b>&lt; 0.001</b> |
| Food Security Status (ref: food secure)    |                        |                     |                   |
| Food Insecure                              | <b>1.47</b>            | <b>(1.15, 1.89)</b> | <b>0.002</b>      |

Abbreviations: OR, Odd Ratio; CI, 95% confidence interval; M1, Model 1. Note: \* Sleep disturbance was defined as greater than mild or without greater than mild. Models are adjusted for age, gender, body mass index, education attainment, marital status, living areas, smoking habits, physical activity volumes, blood pressure values, and food consumption score, CES-D-10 Score. Model 1 is adjusted for age and gender. All statistically significant values are set to < 0.05.

Table S2. The Logistic Regression between Characteristics related to The Sleep Disturbance Level Stratified by Gender.

| Variables                                  | Sleep Disturbance (Men) |              |         | Sleep Disturbance (Women) |              |         |
|--------------------------------------------|-------------------------|--------------|---------|---------------------------|--------------|---------|
|                                            | OR                      | 95% CI       | P value | OR                        | 95% CI       | p value |
| Age (years, ref: ≤ 35)                     |                         |              |         |                           |              |         |
| 36 - 55                                    | 1.04                    | (0.68, 1.57) | 0.866   | 1.73                      | (1.00, 1.82) | 0.016   |
| ≥ 56                                       | 1.26                    | (0.65, 2.40) | 0.493   | 2.54                      | (1.17, 2.72) | 0.002   |
| Educational attainment (ref: ≥ 12 years)   |                         |              |         |                           |              |         |
| Low (< 12 years)                           | 0.46                    | (0.30, 0.71) | < 0.001 | 0.37                      | (0.22, 0.61) | < 0.001 |
| Marital Status (ref: never married)        |                         |              |         |                           |              |         |
| Currently or Ever Married                  | 1.64                    | (0.82, 3.25) | 0.158   | 1.61                      | (0.57, 4.55) | 0.374   |
| Living Areas (ref: rural)                  |                         |              |         |                           |              |         |
| Urban                                      | 1.13                    | (0.78, 1.65) | 0.526   | 0.88                      | (0.62, 1.25) | 0.483   |
| Smoking Habit (ref: never)                 |                         |              |         |                           |              |         |
| Current Smoker                             | 0.35                    | (0.12, 0.99) | 0.048   | 2.12                      | (0.47, 9.55) | 0.329   |
| Quit smoker                                | 0.78                    | (0.50, 1.20) | 0.251   | 0.78                      | (0.30, 2.02) | 0.605   |
| BMI (kg/m <sup>2</sup> , ref: 18.5 - 25.0) |                         |              |         |                           |              |         |
| 25.1 - 27.0                                | 1.50                    | (0.90, 2.49) | 0.121   | 0.66                      | (0.40, 1.11) | 0.118   |
| > 27.0                                     | 0.90                    | (0.50, 1.63) | 0.732   | 0.77                      | (0.52, 1.15) | 0.201   |
| Depressive Symptoms (ref: no)              |                         |              |         |                           |              |         |
| Yes                                        | 3.16                    | (2.17, 4.60) | < 0.001 | 3.93                      | (2.77, 5.57) | < 0.001 |
| Food Security Status (ref: food secure)    |                         |              |         |                           |              |         |
| Food Insecure                              | 1.75                    | (1.19, 2.58) | 0.005   | 1.07                      | (0.76, 1.51) | 0.706   |

Abbreviations: OR, Odd Ratio; CI, 95% confidence interval. Note: \* Sleep disturbance was defined as greater than mild or without greater than mild. Models are adjusted for age, gender, body mass index, education attainment, marital status, living areas, smoking habits, physical activity volumes, blood pressure values, and food consumption score, CES-D-10 Score. All statistically significant values are set to < 0.05.

Table S 3. The Regression Test between Depressive symptoms and Sleep Disturbance by Food Security Status.

| Variable      |                         |                     | Model 1 |               |                | Model 2 |               |                | Model 3 |               |                |
|---------------|-------------------------|---------------------|---------|---------------|----------------|---------|---------------|----------------|---------|---------------|----------------|
|               | Dependent               | Independent         | OR      | 95% CI        | <i>p</i> value | OR      | 95% CI        | <i>p</i> value | OR      | 95% CI        | <i>p</i> value |
| Food Secure   | Sleep Disturbance *     | Depressive Symptoms | 2.99    | (1.97, 4.52)  | < 0.001        | 3.34    | (2.19, 5.09)  | < 0.001        | 3.22    | (1.26, 8.24)  | 0.015          |
| Food Insecure | Sleep Disturbance *     | Depressive Symptoms | 3.08    | (2.25 - 4.21) | < 0.001        | 3.67    | (2.67 - 5.05) | < 0.001        | 3.18    | (1.61 - 6.28) | 0.001          |
|               |                         |                     | $\beta$ | 95% CI        | <i>p</i> value | $\beta$ | 95% CI        | <i>p</i> value | $\beta$ | 95% CI        | <i>p</i> value |
| Food Secure   | Sleep Disturbance Score | CES-D-10 Score      | 2.33    | (2.23, 2.43)  | < 0.001        | 2.32    | (2.22, 2.43)  | < 0.001        | 2.25    | (2.04, 2.48)  | < 0.001        |
| Food Insecure | Sleep Disturbance Score | CES-D-10 Score      | 2.32    | (2.23, 2.42)  | < 0.001        | 2.32    | (2.23, 2.42)  | < 0.001        | 2.17    | (1.97, 2.39)  | < 0.001        |

Abbreviations: OR, Odd Ratio; CI, 95% confidence interval;  $\beta$ , exponentiated beta coefficient; FCG, food consumption group. Note: \* Sleep disturbance was defined as greater than mild or without greater than mild. Model 1 was a unadjusted model. Model 2 was a model with adjustment for age and gender. Model 3 was a Model 2 + adjustment for body mass index, education attainment, marital status, living areas, the status of smoking habit, physical activity volumes, blood pressure values, ethnicity, and chronic diseases (e.g., diabetes or cardiovascular diseases). All statistically significant values are set to < 0.05.

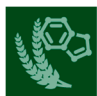

Total IFLS5 data (all ages: 0 - older than 80 years)

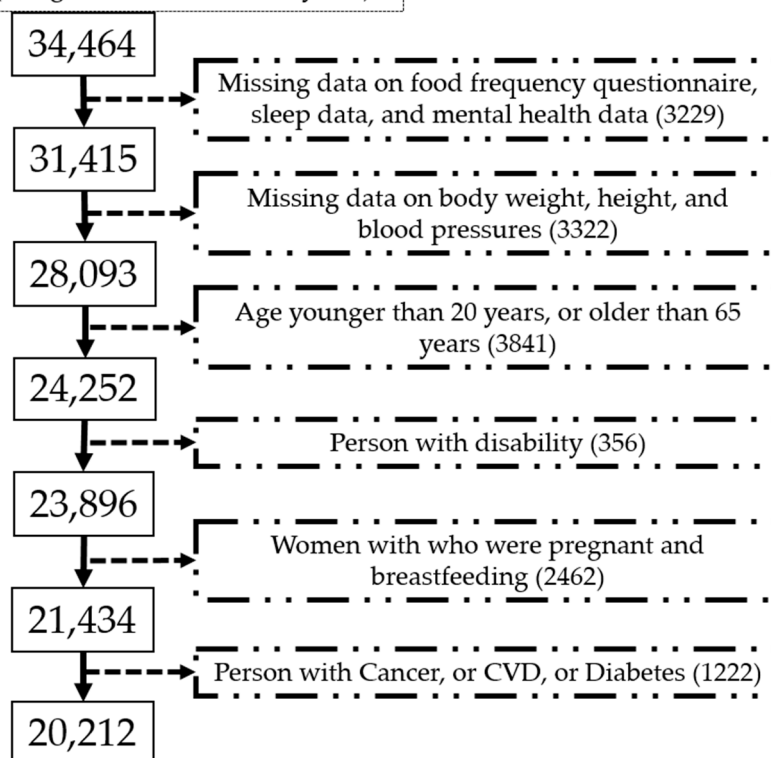

Figure S 1. Flowchart of the Sampling Participants

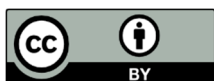

© 2020 by the authors. Submitted for possible open access publication under the terms and conditions of the Creative Commons Attribution (CC BY) license (<http://creativecommons.org/licenses/by/4.0/>).
